# Supplementary material
Source: PubMed Central journal article supplement (PMC2234216)

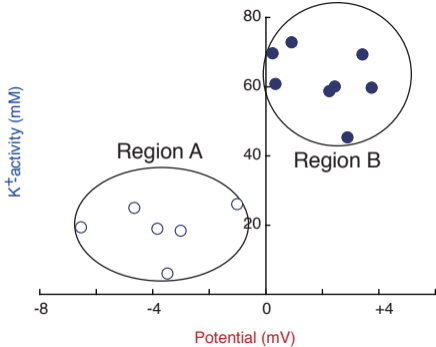

Supplement: pnas_0711463105_1.pdf [file pnas_0711463105_1.pdf]

Insertion

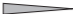

Intrastrial space

Anoxia

Bumetanide

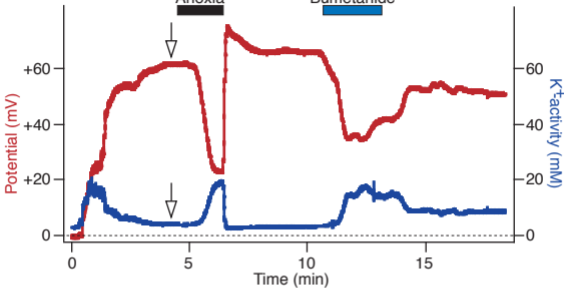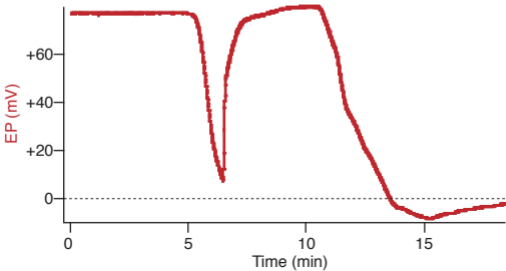

Supplement: pnas_0711463105_2.pdf [file pnas_0711463105_2.pdf]

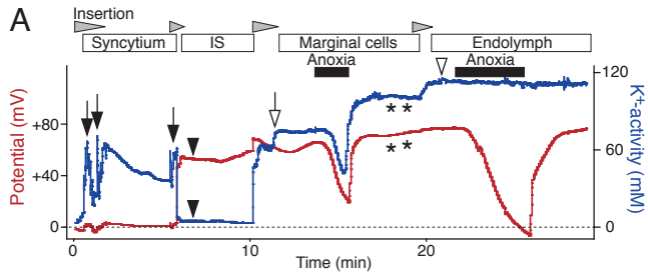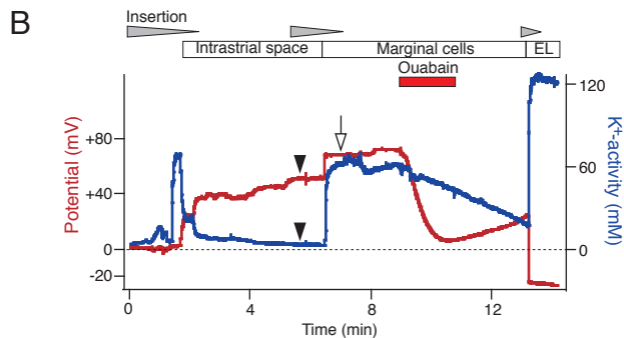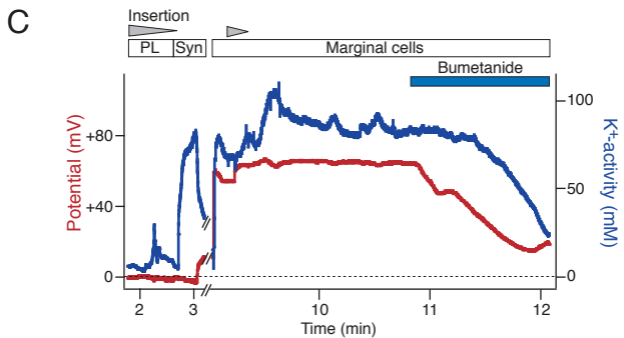

Supplement: pnas_0711463105_3.pdf [file pnas_0711463105_3.pdf]

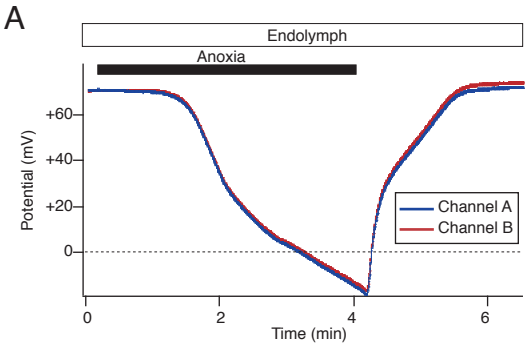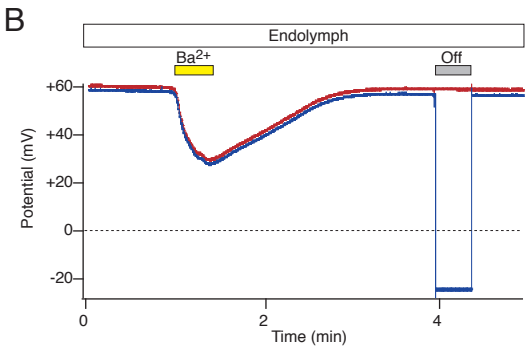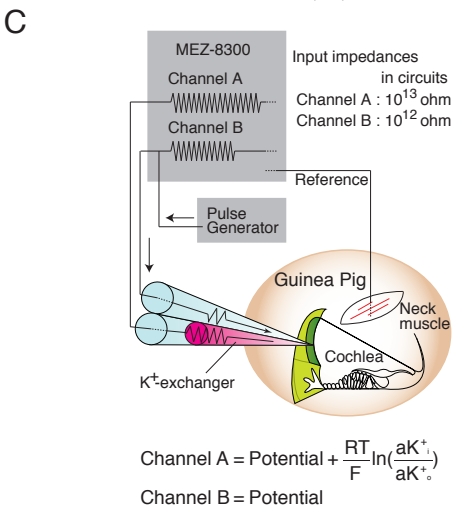

Supplement: pnas_0711463105_4.pdf [file pnas_0711463105_4.pdf]
